# Supplementary material for: Tailoring single-ion magnet properties of coordination polymer C11H18DyN3O9 (Dy-CP) using the radial effective charge model (RECM) and superposition model (SPM)
Source: Royal Society of Chemistry journal article supplement (doi:10.1039/d4cp01861c), 2024-01-01
Supplement: d4cp01861c1.pdf [file d4cp01861c1.pdf]

## Tailoring single-ion magnet properties of coordination polymer $C_{11}H_{18}DyN_3O_9$ (Dy-CP) using Radial Effective Charge model (RECM) and Superposition model (SPM)

Dinabandhu Halder,<sup>a</sup> Yatramohan Jana,<sup>a,\*</sup> Danuta Piwowarska,<sup>b</sup> Paweł Gnutek<sup>b</sup> and Czesław Rudowicz<sup>c</sup>

<sup>a</sup>Department of Physics, University of Kalyani, Kalyani -741235, Nadia, W.B., India

<sup>b</sup>Faculty of Mechanical Engineering and Mechatronics, West Pomeranian University of Technology in Szczecin, 70-311 Szczecin, Poland

<sup>c</sup>Faculty of Chemistry, Adam Mickiewicz University, 61-614 Poznań, Poland

### S1. Crystal structure of $C_{11}H_{18}DyN_3O_9$ (Dy-CP)

The Dy-based coordination polymer  $C_{11}H_{18}DyN_3O_9$  (Dy-CP) crystallizes in a monoclinic space group  $P2_1/c$  ( $C_{2h}^5$ ; no. 14) with a distorted tricapped triangular prismatic geometry.<sup>1</sup> Lattice parameters are:  $a = 11.8534 \text{ \AA}$ ,  $b = 11.8871 \text{ \AA}$ ,  $c = 12.5771 \text{ \AA}$  and  $\beta = 104.182^\circ$ . The unit cell contains four formula units, i.e.,  $Z = 4$  and all atoms reside at 4e Wyckoff sites, having triclinic ( $C_1$ ) site symmetry. Each  $Dy^{3+}$  at triclinic  $C_1$  site is coordinated to nine oxygen ligands bound to different chemical groups: two oxygens, O1 and O2, containing monodentate dimethylformamide (DMF) molecules; three monodentate oxygens, O3, O4 and O9; two bridging oxygens, O5 and O5', with neighbouring Dy; and two oxygens, O6 and O8, containing bidentate bridging nitrate ion (Fig. S1(a)). Two  $Dy^{3+}$  ions interact via two carboxylate oxygen atoms. The atomic coordinates of Dy and oxygen atoms obtained from a CIF data<sup>1</sup> are collected in Table S1. The Dy–O bond lengths vary within the range of 2.26 – 2.65  $\text{\AA}$  (see Table S2) within  $[DyO_9]$  coordination polyhedron (see Fig. S1(b)), while the Dy-Dy bond distances are 7.58, 8.664, 10.455 (in  $\text{\AA}$ ) within the conventional unit cell of Dy-CP.

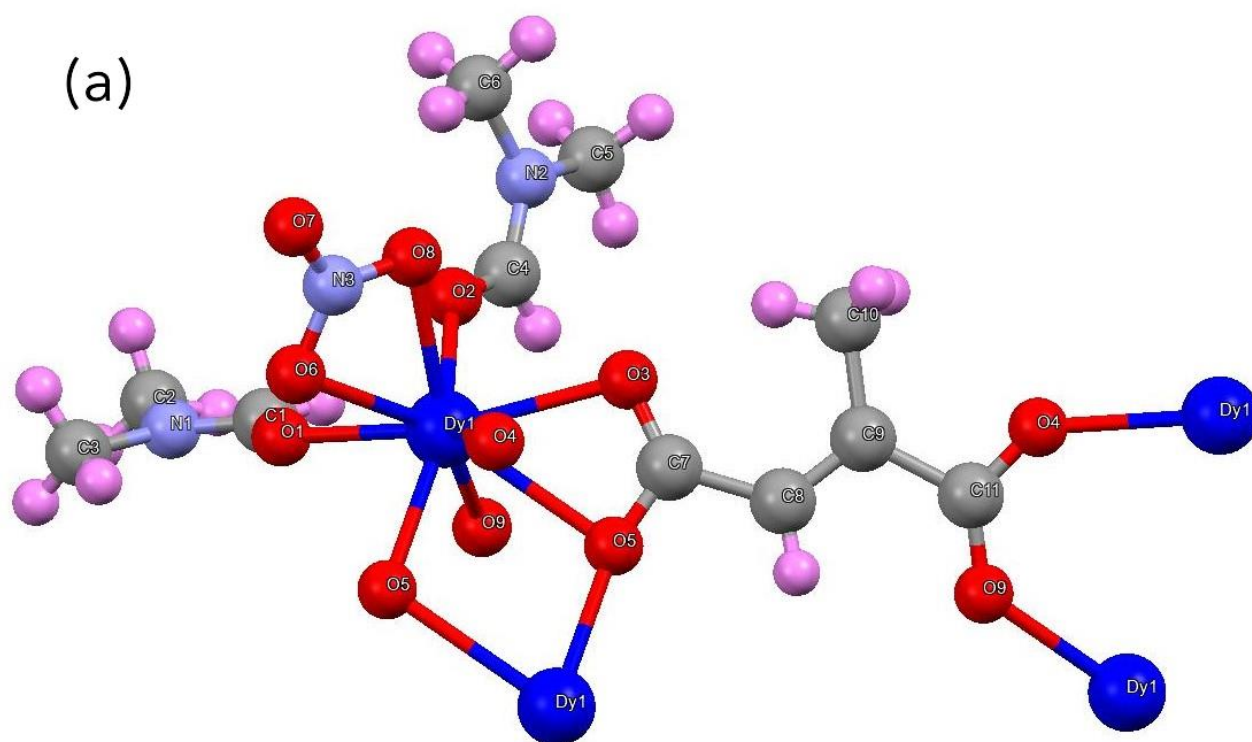

(b)

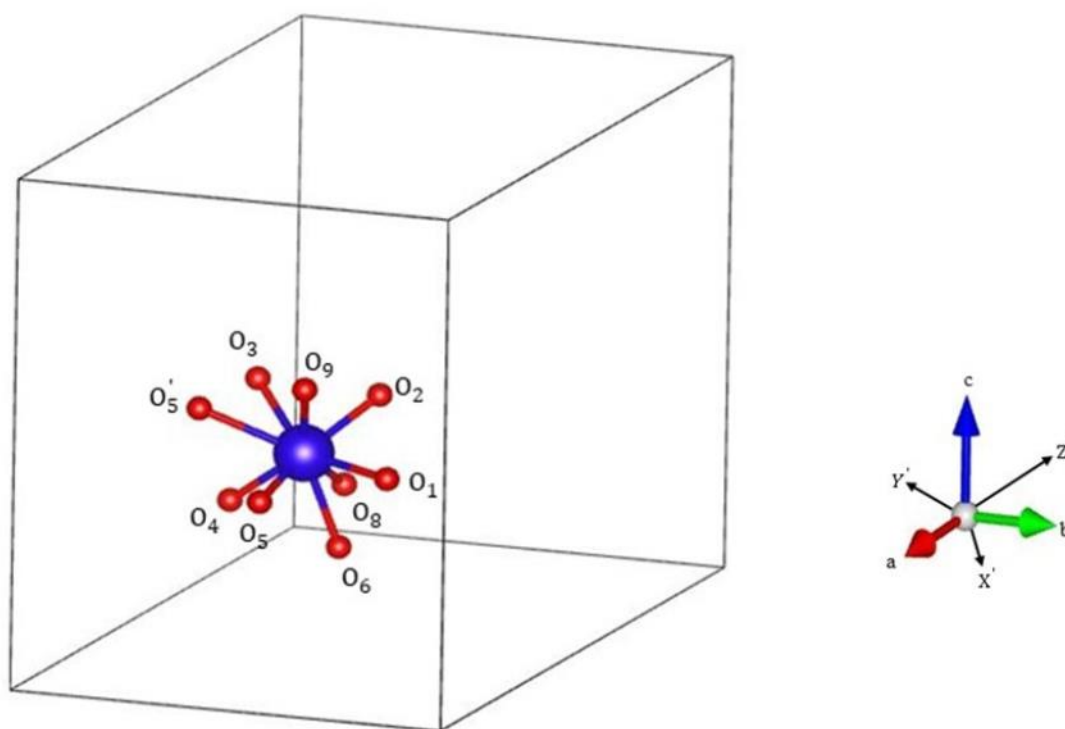

**Fig. S1** (a) Crystal structure of  $C_{11}H_{18}DyN_3O_9$  (Dy-CP). (b) Left panel: The  $[DyO_9]$  polyhedron: Dy ion (blue) coordinated to nine oxygen ions (red) in monoclinic Dy-CP crystal. Right panel: the CAS (a,b,c) and the rotated CAS\* ( $X'$ ,  $Y'$ ,  $Z'$ ). For explanations, see text.

**Table S1** The atomic coordinates of Dy and oxygen atoms in  $[DyO_9]$  polyhedron in Dy-CP compound.<sup>1</sup>

| Atoms           | Atomic coordinates |         |         |
|-----------------|--------------------|---------|---------|
|                 | x/a                | y/b     | z/c     |
| Dy              | 0.84575            | 0.57199 | 0.46070 |
| O <sub>1</sub>  | 0.85400            | 0.77070 | 0.42820 |
| O <sub>2</sub>  | 0.70290            | 0.65270 | 0.53480 |
| O <sub>3</sub>  | 0.79500            | 0.42950 | 0.57930 |
| O <sub>4</sub>  | 0.85580            | 0.40890 | 0.35890 |
| O <sub>5</sub>  | 1.02170            | 0.58580 | 0.42220 |
| O <sub>5'</sub> | 0.97830            | 0.41420 | 0.57780 |
| O <sub>6</sub>  | 0.77890            | 0.61300 | 0.25870 |
| O <sub>8</sub>  | 0.65200            | 0.54060 | 0.33480 |
| O <sub>9</sub>  | 0.96010            | 0.64620 | 0.62690 |

**Table S2** The Dy-O bond lengths ( $r_i$ ), idealized spherical polar coordinates ( $R_i$ ,  $\theta_i$ ,  $\phi_i$ ) in the CAS\*, the angles ( $\vartheta_i$ ,  $\varphi_i$ ) in the rotated CAS\*, and the effective charge of oxygen ligands surrounding Dy atom in Dy-CP that serve as input for SIMPRE calculations. For explanations, see, text.

| Oxygen atoms    | $r_i$ (Å) | Idealized spherical polar coordinates in |                |              |                   |                 | $Z_i$  |
|-----------------|-----------|------------------------------------------|----------------|--------------|-------------------|-----------------|--------|
|                 |           | CAS*                                     |                |              | rotated CAS*      |                 |        |
|                 |           | $R_i$ (Å)                                | $\theta_i$ (°) | $\phi_i$ (°) | $\vartheta_i$ (°) | $\varphi_i$ (°) |        |
| O <sub>1</sub>  | 2.4033    | 1.5033                                   | 100.37         | 87.70        | 80.86             | 269.92          | -0.212 |
| O <sub>2</sub>  | 2.3301    | 1.4301                                   | 54.70          | 149.7        | 12.8              | 212.55          | -0.212 |
| O <sub>3</sub>  | 2.4281    | 1.5481                                   | 47.54          | 251.0        | 71.42             | 112.0           | -0.199 |
| O <sub>4</sub>  | 2.3424    | 1.4424                                   | 124.0          | 273.41       | 122.1             | 48.42           | -0.199 |
| O <sub>5</sub>  | 2.2597    | 1.3597                                   | 116.13         | 4.64         | 159.42            | 254.60          | -0.192 |
| O <sub>5'</sub> | 2.6499    | 1.7699                                   | 65.76          | 309.10       | 119.5             | 128.82          | -0.192 |
| O <sub>6</sub>  | 2.5167    | 1.6367                                   | 158.81         | 147.60       | 96.85             | 338.0           | -0.206 |
| O <sub>8</sub>  | 2.4777    | 1.5977                                   | 114.33         | 189.51       | 58.4              | 13.15           | -0.206 |
| O <sub>9</sub>  | 2.3657    | 1.4657                                   | 42.0           | 33.87        | 91.14             | 195.1           | -0.199 |

**Table S3** The predicted crystal-field parameters (CFPs) in  $\text{cm}^{-1}$  together with the invariant quantities: the Stevens CFPs/ $C_k^q$  calculated using RECM: (b) in the CAS\* and (c) in the rotated CAS\*; converted Wybourne CFPs/ $B_{kq}$ : (e) from column (b), (f) from column (c); and (g) SPM/ $B_{kq}$ . The respective CFPs/ $B_{kq}$  after the 3DD and CST standardisation are listed in columns (x/3DD),  $x = e, f, g$ . For explanations, see, text.

| Stevens CFPs |         |         | Wybourne CFPs        |              |                       |              |              |                       |               |                       |
|--------------|---------|---------|----------------------|--------------|-----------------------|--------------|--------------|-----------------------|---------------|-----------------------|
| $C_k^q$      |         |         | $B_{kq}^{\square}$   |              |                       |              |              |                       | SPM/ $B_{kq}$ |                       |
| (a)          | (b)     | (c)     | (d)                  | (e)          | (e/3DD) <sup>1)</sup> | (e'/CST)     | (f)          | (f/3DD) <sup>2)</sup> | (g)           | (g/3DD) <sup>3)</sup> |
| $C_2^0$      | 8.5     | 88.7    | $B_{20}$             | 17.1         | -234.0                | 268.8        | 177.4        | 268.8                 | 177.4         | 270.3                 |
| $C_2^1$      | 166.5   | 200.0   | $B_{21}^r$           | -68.0        | 0                     | 0            | -81.7        | 0                     | -81.5         | 0                     |
| $C_2^{-1}$   | -442.4  | 208.3   | $B_{21}^i$           | -180.6       | 0                     | 0            | 85.0         | 0                     | 86.1          | 0                     |
| $C_2^2$      | 30.0    | 73.1    | $B_{22}^r$           | 24.5         | -124.0                | 81.3         | 59.7         | 81.3                  | 61.0          | 83.6                  |
| $C_2^{-2}$   | -84.3   | 119.5   | $B_{22}^i$           | 68.8         | 0                     | 0            | -97.6        | 0                     | -100.0        | 0                     |
|              |         |         | <b>S<sub>2</sub></b> | <b>130.7</b> | <b>130.7</b>          | <b>130.7</b> | <b>130.7</b> | <b>130.7</b>          | <b>132.0</b>  | <b>131.9</b>          |
| $C_4^0$      | -99.0   | 116.7   | $B_{40}$             | -792.0       | 662.2                 | 59.0         | 933.8        | 58.8                  | 933.0         | -23.6                 |
| $C_4^1$      | -513.8  | 68.4    | $B_{41}^r$           | 459.5        | -13.1                 | 275.3        | -61.2        | 275.1                 | 40.4          | 233.2                 |
| $C_4^{-1}$   | 33.5    | -399.8  | $B_{41}^i$           | 30.0         | 309.6                 | -97.1        | -357.6       | 97.6                  | -358.0        | 146.0                 |
| $C_4^2$      | 131.0   | -118.5  | $B_{42}^r$           | 165.7        | 16.4                  | 397.9        | -150.0       | 398.4                 | -163.6        | 442.2                 |
| $C_4^{-2}$   | 56.6    | 256.8   | $B_{42}^i$           | -71.6        | -127.0                | 535.9        | -325.0       | -535.3                | -332.0        | -498.0                |
| $C_4^3$      | 337.6   | -1138.8 | $B_{43}^r$           | -114.1       | 578.0                 | 31.7         | 385.0        | 32.4                  | 386.0         | 67.3                  |
| $C_4^{-3}$   | -1043.3 | 71.7    | $B_{43}^i$           | -352.7       | -497.8                | 578.1        | 24.2         | -578.6                | 24.5          | -592.7                |
| $C_4^4$      | 586.7   | 271.0   | $B_{44}^r$           | 561.0        | -193.4                | 311.3        | 259.1        | 311.0                 | 262.2         | 323.5                 |
| $C_4^{-4}$   | 35.0    | 330.8   | $B_{44}^i$           | -33.3        | -246.3                | -216.6       | -316.3       | 216.7                 | -321.3        | 209.1                 |

|            |        |        |                              |              |              |              |              |              |              |              |
|------------|--------|--------|------------------------------|--------------|--------------|--------------|--------------|--------------|--------------|--------------|
|            |        |        | <b>S<sub>4</sub></b>         | <b>474.1</b> | <b>474.1</b> | <b>474.2</b> | <b>474.1</b> | <b>474.2</b> | <b>477.0</b> | <b>477.0</b> |
| $C_6^0$    | 22.3   | 20.8   | B <sub>60</sub>              | 356.8        | -97.5        | 162.1        | 332.5        | 162.0        | 332.5        | 111.7        |
| $C_6^1$    | -94.7  | 138.8  | B <sub>61</sub> <sup>r</sup> | 117.0        | -212.6       | -35.1        | -171.4       | -35.0        | -170.6       | -15.1        |
| $C_6^{-1}$ | 230.2  | -177.5 | B <sub>61</sub> <sup>i</sup> | 284.2        | -116.5       | -56.0        | -219.1       | 56.2         | -233.0       | 58.7         |
| $C_6^2$    | -105.3 | -75.2  | B <sub>62</sub> <sup>r</sup> | -164.5       | -101.4       | 198.8        | -117.4       | 198.8        | -75.3        | 137.6        |
| $C_6^{-2}$ | 56.8   | 90.7   | B <sub>62</sub> <sup>i</sup> | -88.6        | -183.3       | 277.3        | -141.6       | -277.1       | -142.0       | -296.4       |
| $C_6^3$    | -149.3 | 167.5  | B <sub>63</sub> <sup>r</sup> | 116.6        | -269.7       | 83.4         | -130.7       | 84.0         | -134.7       | 91.0         |
| $C_6^{-3}$ | -155.6 | 255.5  | B <sub>63</sub> <sup>i</sup> | -121.5       | 180.2        | 92.3         | 199.5        | -92.4        | 134.5        | -102.8       |
| $C_6^4$    | 59.0   | -192.0 | B <sub>64</sub> <sup>r</sup> | 84.1         | -237.3       | -168.0       | -273.5       | -167.3       | -275.5       | -133.0       |
| $C_6^{-4}$ | -34.2  | -25.7  | B <sub>64</sub> <sup>i</sup> | 48.7         | 205.0        | 215.7        | 36.7         | -216.0       | 60.3         | -197.1       |
| $C_6^5$    | 761.1  | -72.3  | B <sub>65</sub> <sup>r</sup> | -231.3       | -104.1       | -278.1       | 22.0         | -277.8       | -29.2        | -285.5       |
| $C_6^{-5}$ | -507.2 | -600.7 | B <sub>65</sub> <sup>i</sup> | -154.1       | 43.0         | 190.4        | -182.5       | -191.0       | -203.0       | -230.1       |
| $C_6^6$    | -88.2  | -93.7  | B <sub>66</sub> <sup>r</sup> | -93.0        | 105.1        | 39.3         | -98.6        | 39.3         | -131.3       | 88.5         |
| $C_6^{-6}$ | 158.6  | 36.2   | B <sub>66</sub> <sup>i</sup> | -167.0       | -99.6        | 73.2         | -38.1        | -73.2        | -76.4        | -105.1       |
|            |        |        | <b>S<sub>6</sub></b>         | <b>230.3</b> | <b>230.3</b> | <b>230.3</b> | <b>230.2</b> | <b>230.2</b> | <b>230.5</b> | <b>230.5</b> |
|            |        |        | <b>S</b>                     | <b>313.5</b> |              |              | <b>313.5</b> |              | <b>315.2</b> |              |

The Euler angles are: <sup>1)</sup>  $\alpha = 87.26$ ,  $\beta = 49.17$ ,  $\gamma = -62.63$ ; <sup>2)</sup>  $\alpha = 36.81$ ,  $\beta = 32.67$ ,  $\gamma = -12.90$ ; <sup>3)</sup>  $\alpha = 36.90$ ,  $\beta = 32.98$ ,  $\gamma = -12.98$  (all in degree).

**Table S4** The calculated low-lying electronic energy ( $E_i$ ) levels in  $\text{cm}^{-1}$  within the ground multiplet  ${}^6\text{H}_{15/2}$  and associated wave functions ( $\Psi_i$ ) of  $\text{Dy}^{3+}$  ion in Dy-CP: (a)  $E_i$ , (b)  $\Psi_i$  and (c) g-tensor predicted using Stevens CFPs/ $C_k^q$  calculated using RECM in the rotated CAS\* (column c in Table S3); (d)  $E_i$ , (e)  $\Psi_i$  and (f) g-tensor predicted using the converted Wybourne CFPs/ $B_{kq}$  (column f in Table S3); and (g)  $E_i$  using SPM CFPs/ $B_{kq}$  (column g in Table S3). Only the modulus square of each  $M_J$  contribution greater than 5% is provided (except for the ground doublet). Barycenter ( $\bar{E}$ ) of the energy levels in  $\text{cm}^{-1}$  is also given.

| SIMPRES |                                                                                                                                                                                                                                                                                                                                                                                |                                                      | SPECTRE |                                                                                                                                                                                                                                                                                                                                                                                |                                                      |       |
|---------|--------------------------------------------------------------------------------------------------------------------------------------------------------------------------------------------------------------------------------------------------------------------------------------------------------------------------------------------------------------------------------|------------------------------------------------------|---------|--------------------------------------------------------------------------------------------------------------------------------------------------------------------------------------------------------------------------------------------------------------------------------------------------------------------------------------------------------------------------------|------------------------------------------------------|-------|
| $E_i$   | $\Psi_i$                                                                                                                                                                                                                                                                                                                                                                       | g-tensor<br>( $g_{X_i}$ , $g_{Y_i}$ ,<br>$g_{Z_i}$ ) | $E_i$   | $\Psi_i$                                                                                                                                                                                                                                                                                                                                                                       | g-tensor<br>( $g_{X_i}$ , $g_{Y_i}$ ,<br>$g_{Z_i}$ ) | $E_i$ |
| (a)     | (b)                                                                                                                                                                                                                                                                                                                                                                            | (c)                                                  | (d)     | (e)                                                                                                                                                                                                                                                                                                                                                                            | (f)                                                  | (g)   |
| 0.0     | $0.87 \mp \frac{15}{2}\rangle + 0.01 \mp \frac{11}{2}\rangle +$<br>$0.03 \mp \frac{9}{2}\rangle + 0.02 \mp \frac{7}{2}\rangle +$<br>$0.023 \mp \frac{3}{2}\rangle + 0.023 \mp \frac{1}{2}\rangle +$<br>$0.013 \pm \frac{1}{2}\rangle + 0.005 \pm \frac{3}{2}\rangle +$<br>$0.004 \pm \frac{5}{2}\rangle + 0.002 \pm \frac{7}{2}\rangle +$<br>$0.002 \pm \frac{9}{2}\rangle \#$ | 1.03, 0.28,<br>18.1                                  | 0.0     | $0.862 \mp \frac{15}{2}\rangle + 0.01 \mp \frac{11}{2}\rangle +$<br>$+ 0.033 \mp \frac{9}{2}\rangle + 0.02 \mp \frac{7}{2}\rangle +$<br>$+ 0.02 \mp \frac{3}{2}\rangle + 0.02 \mp \frac{1}{2}\rangle +$<br>$0.015 \pm \frac{1}{2}\rangle + 0.003 \pm \frac{3}{2}\rangle +$<br>$0.004 \pm \frac{5}{2}\rangle + 0.003 \pm \frac{7}{2}\rangle +$<br>$0.01 \pm \frac{9}{2}\rangle$ | 0.68, 0.36,<br>17.82                                 | 0     |
| 30.7    | $0.08 \mp \frac{15}{2}\rangle + 0.26 \mp \frac{3}{2}\rangle +$<br>$0.18 \mp \frac{1}{2}\rangle + 0.25 \pm \frac{1}{2}\rangle +$<br>$0.08 \pm \frac{5}{2}\rangle$                                                                                                                                                                                                               | 9.94, 0.34,<br>2.01                                  | 28.4    | $0.07 \mp \frac{15}{2}\rangle + 0.26 \mp \frac{3}{2}\rangle +$<br>$0.18 \mp \frac{1}{2}\rangle + 0.24 \pm \frac{1}{2}\rangle +$<br>$0.10 \pm \frac{5}{2}\rangle$                                                                                                                                                                                                               | 14.66,<br>0.57, 1.70                                 | 29.6  |

|                          |                                                                                                                                                                                                                                                  |                     |              |                                                                                                                                                                                                                                                                                  |                      |       |
|--------------------------|--------------------------------------------------------------------------------------------------------------------------------------------------------------------------------------------------------------------------------------------------|---------------------|--------------|----------------------------------------------------------------------------------------------------------------------------------------------------------------------------------------------------------------------------------------------------------------------------------|----------------------|-------|
| 74.0                     | $0.39  \mp \frac{13}{2} \rangle + 0.13  \mp \frac{7}{2} \rangle +$<br>$0.14  \mp \frac{5}{2} \rangle + 0.1  \mp \frac{3}{2} \rangle +$<br>$0.08  \pm \frac{1}{2} \rangle$                                                                        | 2.50, 4.50,<br>9.15 | 69.3         | $0.20  \mp \frac{13}{2} \rangle + 0.05  \mp \frac{9}{2} \rangle +$<br>$0.11  \mp \frac{7}{2} \rangle + 0.15  \mp \frac{5}{2} \rangle +$<br>$0.06  \pm \frac{1}{2} \rangle + 0.11  \pm \frac{3}{2} \rangle +$<br>$0.15  \pm \frac{13}{2} \rangle$                                 | 1.90, 9.27,<br>2.91  | 70.6  |
| 104.6                    | $0.32  \mp \frac{13}{2} \rangle + 0.11  \mp \frac{11}{2} \rangle +$<br>$0.08  \mp \frac{9}{2} \rangle + 0.14  \mp \frac{5}{2} \rangle +$<br>$0.07  \pm \frac{1}{2} \rangle + 0.07  \pm \frac{3}{2} \rangle$                                      | 6.88,<br>4.31, 8.68 | 99.5         | $0.21  \mp \frac{13}{2} \rangle + 0.06  \mp \frac{9}{2} \rangle +$<br>$0.05  \mp \frac{7}{2} \rangle + 0.1  \mp \frac{3}{2} \rangle +$<br>$0.06  \pm \frac{1}{2} \rangle + 0.13  \pm \frac{5}{2} \rangle +$<br>$0.12  \pm \frac{11}{2} \rangle + 0.14  \pm \frac{13}{2} \rangle$ | 8.26, 3.25,<br>0.87  | 99.4  |
| 166.4                    | $0.09  \mp \frac{13}{2} \rangle + 0.24  \mp \frac{11}{2} \rangle +$<br>$0.07  \mp \frac{7}{2} \rangle + 0.15  \mp \frac{3}{2} \rangle +$<br>$0.19  \mp \frac{1}{2} \rangle + 0.07  \pm \frac{1}{2} \rangle +$<br>$0.07  \pm \frac{3}{2} \rangle$ | 2.15, 3.45,<br>6.21 | 160.0        | $0.1  \mp \frac{13}{2} \rangle + 0.23  \mp \frac{11}{2} \rangle +$<br>$0.07  \mp \frac{7}{2} \rangle + 0.14  \mp \frac{3}{2} \rangle +$<br>$0.18  \mp \frac{1}{2} \rangle + 0.08  \pm \frac{1}{2} \rangle +$<br>$0.07  \pm \frac{3}{2} \rangle$                                  | 2.84, 4.77,<br>6.17  | 163.0 |
| 294.8                    | $0.27  \mp \frac{11}{2} \rangle + 0.16  \mp \frac{9}{2} \rangle +$<br>$0.23  \mp \frac{5}{2} \rangle + 0.19  \mp \frac{3}{2} \rangle +$<br>$0.06  \mp \frac{1}{2} \rangle$                                                                       | 2.52, 1.78,<br>8.25 | 290.0        | $0.23  \mp \frac{11}{2} \rangle + 0.1  \mp \frac{9}{2} \rangle +$<br>$0.14  \mp \frac{5}{2} \rangle + 0.15  \mp \frac{3}{2} \rangle +$<br>$0.1  \pm \frac{5}{2} \rangle + 0.07  \pm \frac{9}{2} \rangle +$<br>$0.05  \pm \frac{11}{2} \rangle$                                   | 2.39,<br>10.28, 3.86 | 286.0 |
| 327.0                    | $0.06  \mp \frac{13}{2} \rangle + 0.17  \mp \frac{9}{2} \rangle +$<br>$0.37  \mp \frac{7}{2} \rangle + 0.17  \mp \frac{5}{2} \rangle +$<br>$0.06  \pm \frac{9}{2} \rangle$                                                                       | 0.83, 6.52,<br>6.95 | 321.5        | $0.06  \mp \frac{13}{2} \rangle + 0.2  \mp \frac{9}{2} \rangle +$<br>$0.22  \mp \frac{7}{2} \rangle + 0.11  \mp \frac{5}{2} \rangle +$<br>$0.07  \pm \frac{5}{2} \rangle + 0.20  \pm \frac{7}{2} \rangle$                                                                        | 4.90,<br>10.76, 3.89 | 322.3 |
| 358.0                    | $0.07  \mp \frac{13}{2} \rangle + 0.21  \mp \frac{11}{2} \rangle +$<br>$0.32  \mp \frac{9}{2} \rangle + 0.15  \mp \frac{7}{2} \rangle +$<br>$0.05  \pm \frac{5}{2} \rangle + 0.06  \pm \frac{7}{2} \rangle$                                      | 2.41, 3.57,<br>8.64 | 351.3        | $0.07  \mp \frac{13}{2} \rangle + 0.12  \mp \frac{11}{2} \rangle +$<br>$0.25  \mp \frac{9}{2} \rangle + 0.06  \mp \frac{7}{2} \rangle +$<br>$0.15  \pm \frac{7}{2} \rangle + 0.10  \pm \frac{9}{2} \rangle +$<br>$0.10  \pm \frac{11}{2} \rangle$                                | 10.07,<br>7.28, 2.73 | 355.2 |
| Barycentre ( $\bar{E}$ ) |                                                                                                                                                                                                                                                  |                     |              |                                                                                                                                                                                                                                                                                  |                      |       |
| <b>169.5</b>             |                                                                                                                                                                                                                                                  |                     | <b>165.0</b> |                                                                                                                                                                                                                                                                                  | <b>165.8</b>         |       |

# For comparison, the wave function of the ground Kramers doublet obtained using the Stevens CFPs/ $C_k^q$  (listed in column b in Table S3) expressed in the CAS\* is:

$$\Psi_0 = 0.002| \mp \frac{15}{2} \rangle + 0.05| \mp \frac{13}{2} \rangle + 0.10| \mp \frac{11}{2} \rangle + 0.17| \mp \frac{9}{2} \rangle + 0.23| \mp \frac{7}{2} \rangle + 0.20| \mp \frac{5}{2} \rangle + 0.12| \mp \frac{3}{2} \rangle + 0.024| \mp \frac{1}{2} \rangle + 0.01| \pm \frac{1}{2} \rangle + 0.014| \pm \frac{3}{2} \rangle + 0.02| \pm \frac{5}{2} \rangle + 0.005| \pm \frac{7}{2} \rangle + 0.007| \pm \frac{9}{2} \rangle + 0.03| \pm \frac{11}{2} \rangle + 0.023| \pm \frac{13}{2} \rangle + 0.003| \pm \frac{15}{2} \rangle$$

**Table S5** The transition magnetic moment,  $\langle\mu\rangle$  ( $\mu_B/Dy$ ) between the Kramers states. For explanations, see, text.

| $\langle\mu\rangle$    | $ +15/2\rangle$ | $ -15/2\rangle$ | $ +1/2, +3/2\rangle$ | $ -1/2, -3/2\rangle$ | $ +13/2, +5/2\rangle$ | $ -13/2, -5/2\rangle$ | $ +13/2, +11/2\rangle$ | $ -13/2, -11/2\rangle$ |
|------------------------|-----------------|-----------------|----------------------|----------------------|-----------------------|-----------------------|------------------------|------------------------|
| $ +15/2\rangle$        | 3.338           | 0.211           | 1.517                | 0.782                | 1.873                 | 0.36                  | 0.682                  | 0.36                   |
| $ -15/2\rangle$        | 0.211           | 3.338           | 0.782                | 1.517                | 0.36                  | 1.873                 | 0.36                   | 0.682                  |
| $ +1/2, +3/2\rangle$   | 1.517           | 0.782           | 2.63                 | 1.712                | 1.442                 | 0.516                 | 1.665                  | 1.237                  |
| $ -1/2, -3/2\rangle$   | 0.782           | 1.517           | 1.712                | 2.63                 | 0.515                 | 1.442                 | 1.238                  | 1.666                  |
| $ +13/2, +5/2\rangle$  | 1.873           | 0.36            | 1.442                | 0.515                | 3.18                  | 1.166                 | 2.5                    | 1.49                   |
| $ -13/2, -5/2\rangle$  | 0.36            | 1.873           | 0.516                | 1.442                | 1.166                 | 3.18                  | 1.488                  | 2.5                    |
| $ +13/2, +11/2\rangle$ | 0.682           | 0.36            | 1.665                | 1.238                | 2.5                   | 1.488                 | 2.495                  | 1.864                  |
| $ -13/2, -11/2\rangle$ | 0.36            | 0.682           | 1.237                | 1.666                | 1.49                  | 2.5                   | 1.864                  | 2.495                  |

**Table S6** The percentage root-mean-square (r.m.s.) deviations,  $\Delta\chi_{rms}$  ( $\Delta\chi_{rms}^{-1}$ ), between the magnetic susceptibility  $\chi_{ave}$  (inverse susceptibility  $\chi_{ave}^{-1}$ ) calculated using: (i) the Stevens CFPs/ $C_k^q$  listed in column c in Table S3 calculated using RECM (computed with SIMPRE), (ii) the converted Wybourne CFPs/ $B_{kq}$  listed in column f in Table S3 (computed with SPECTRE) and (iii) SPM CFPs/ $B_{kq}$  given in column g in Table S3 (computed with SPECTRE), and the experimental data.<sup>2</sup> For explanations, see, text.

|                  | $\Delta\chi_{rms}\%$ |            |             | $\Delta\chi_{rms}^{-1}\%$ |            |             |
|------------------|----------------------|------------|-------------|---------------------------|------------|-------------|
|                  | 1.8 – 300 K          | 1.8 – 20 K | 200 – 300 K | 1.8 – 300 K               | 1.8 – 20 K | 200 – 300 K |
| RECM/<br>SIMPRE  | 0.2                  | 0.47       | 0.08        | 0.03                      | 0.08       | 0.08        |
| RECM/<br>SPECTRE | 0.34                 | 0.83       | 0.2         | 0.1                       | 0.12       | 0.22        |
| SPM/<br>SPECTRE  | 0.35                 | 0.9        | 0.2         | 0.1                       | 0.14       | 0.23        |

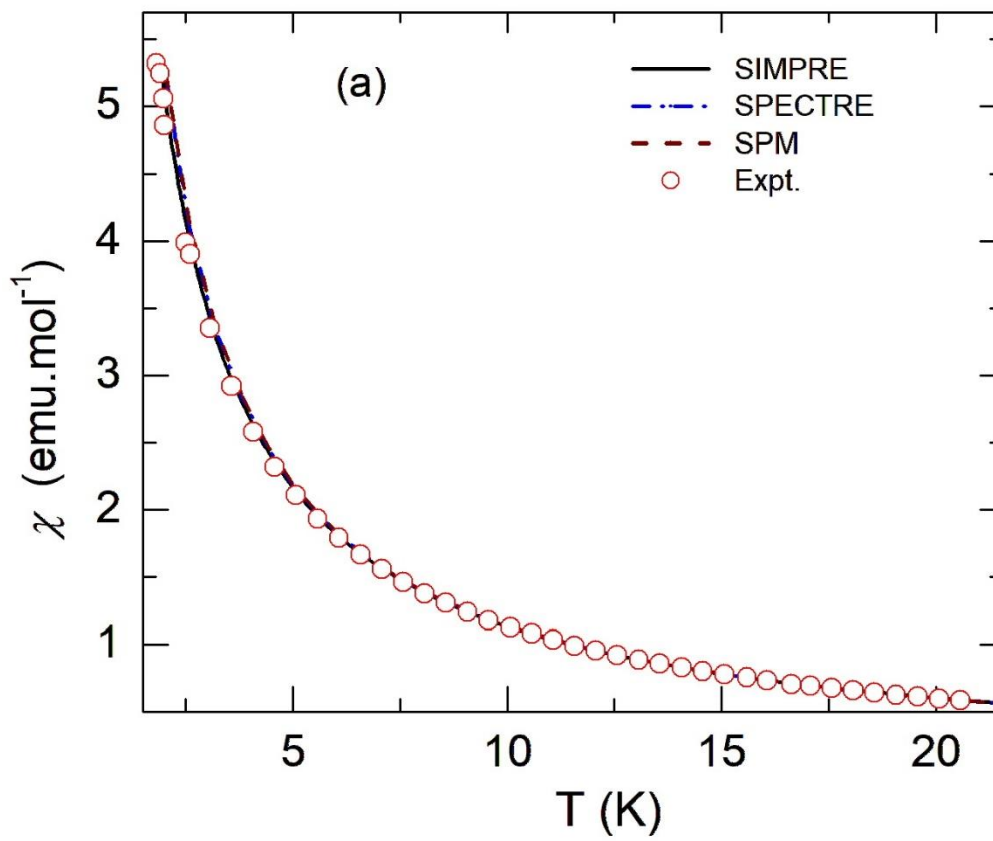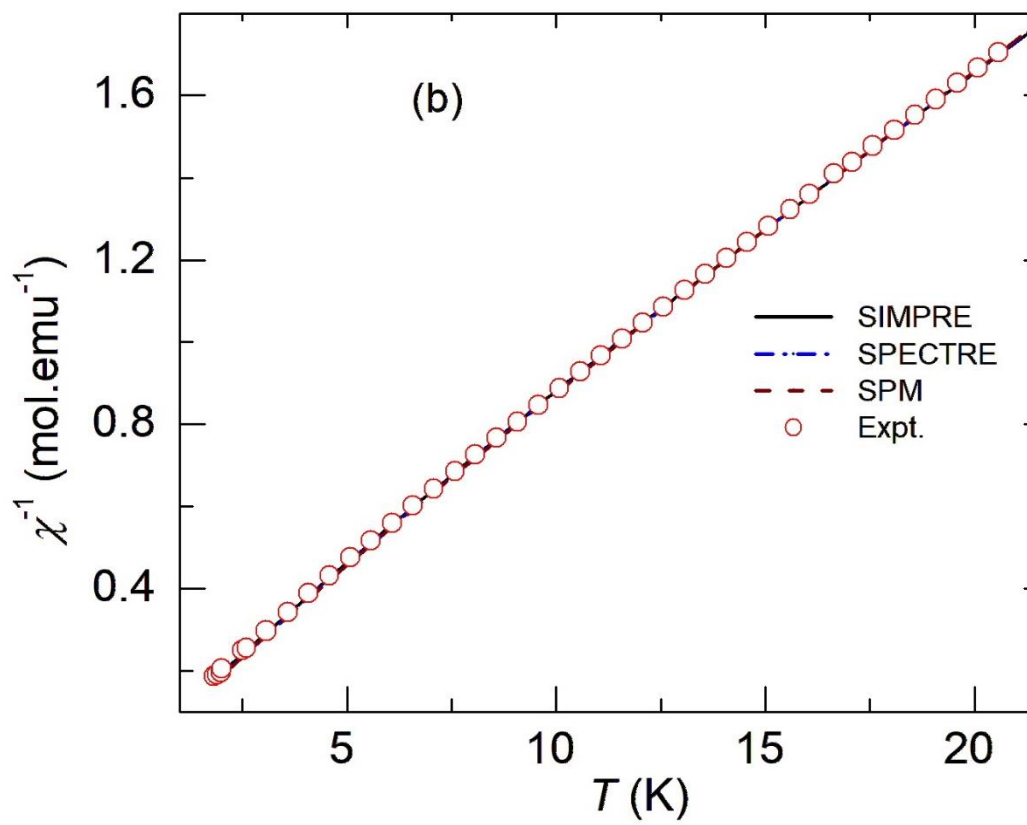

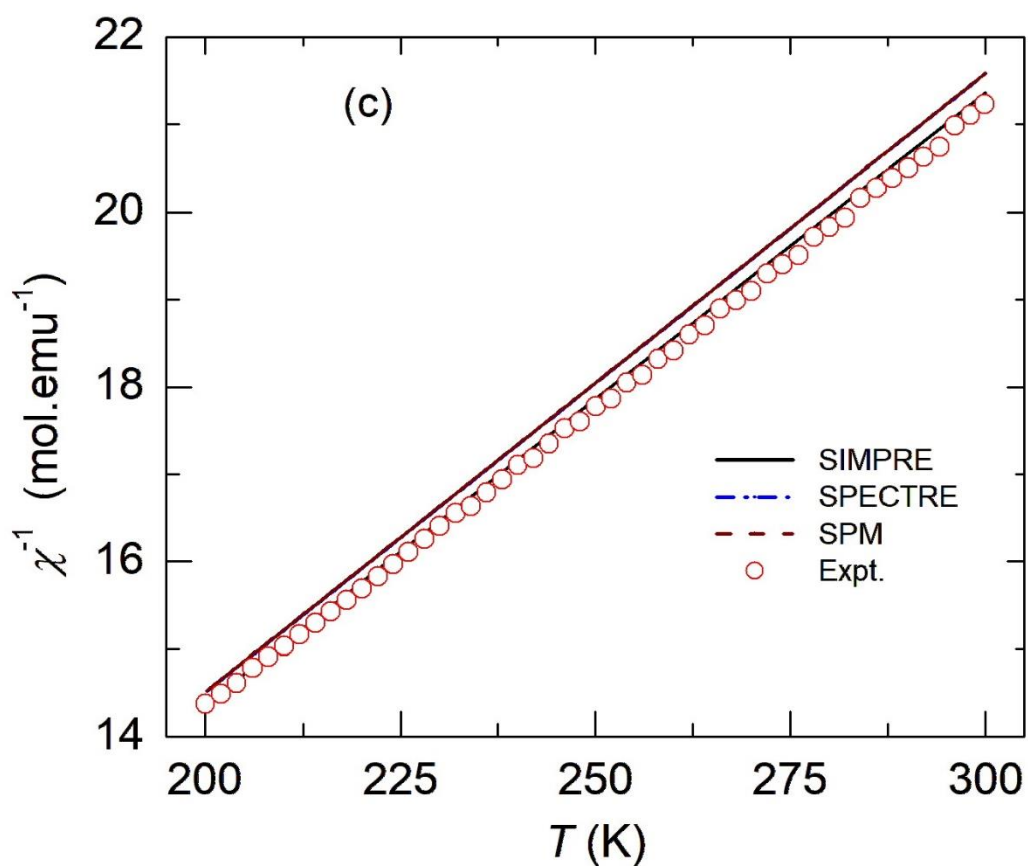

**Fig. S2** Temperature variation of the dc magnetic susceptibility: (a)  $\chi$  within 1.8–20 K, (b)  $\chi^{-1}$  within 1.8–20 K, and (c)  $\chi^{-1}$  within 200–300 K predicted using: (i) the Stevens CFPs/ $C_k^q$  listed in column c in Table S3 calculated using RECM (computed with SIMPRE), (ii) the converted Wybourne CFPs/ $B_{kq}$  listed in column f in Table S3 (computed with SPECTRE) and (iii) SPM CFPs/ $B_{kq}$  listed in column f in Table S3 (computed with SPECTRE), and the experimental data (○).<sup>2</sup> For explanations, see, text.



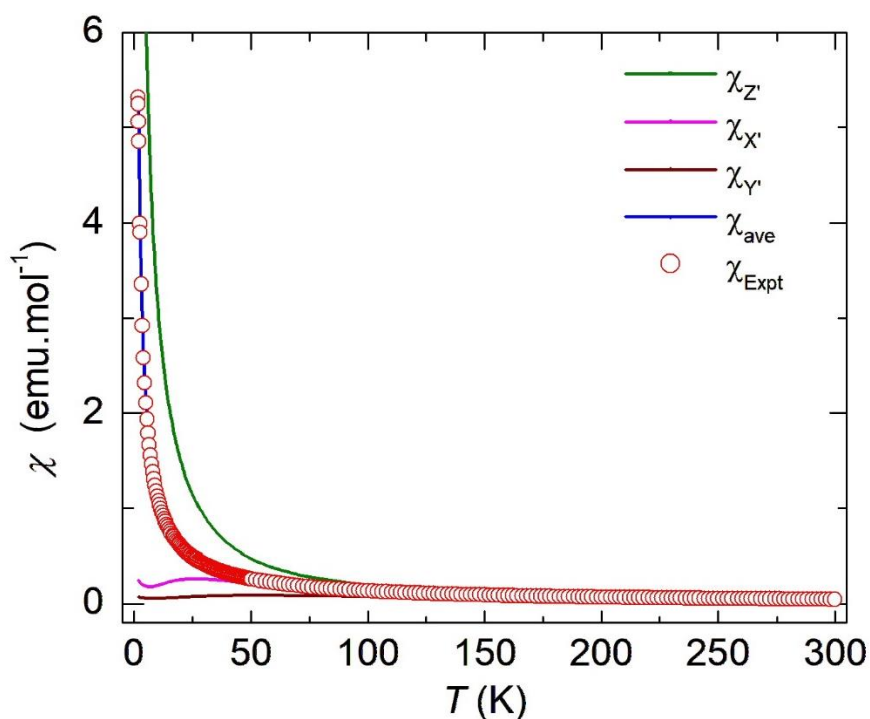

**Fig. S3** Temperature variation of the directional magnetic susceptibility along the ( $X'$ ,  $Y'$ ,  $Z'$ ) axis of the rotated CAS\* system computed with SIMPRE using the Stevens CFPs/ $C_k^q$  (listed in column c in Table S3) together with the calculated average susceptibility  $\chi_{ave}$  that matches with the experimental data ( $\circ$ ) recorded at  $H = 0.1 \text{ T}$ .<sup>2</sup>

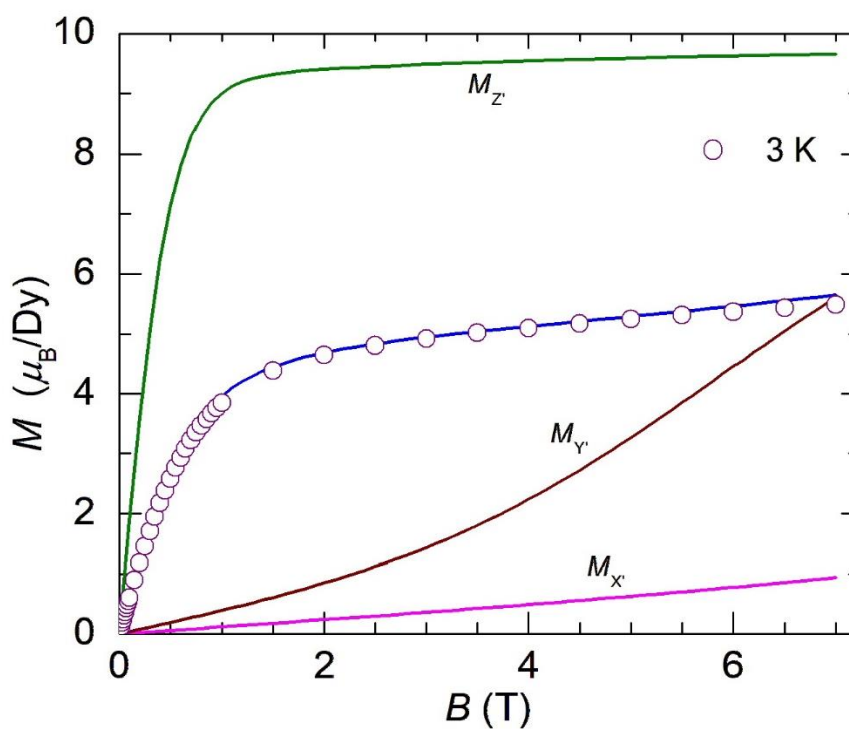

**Fig. S4** Directional magnetization along the ( $X'$ ,  $Y'$ ,  $Z'$ ) axis of the rotated CAS\* system predicted at  $T = 3 \text{ K}$  using the Stevens CFPs/ $C_k^q$  (listed in column c in Table S3) with the calculated average of magnetization  $M_{ave}$  (blue line) that matches with the experimental data ( $\circ$ ) at  $T = 3 \text{ K}$ .<sup>2</sup>

## References

- 1 B. Devi, R. R. Koner and A. Halder, *New J. Chem.*, 2017, **41**, 7972–7979.
- 2 S. Singh, Sheetal, B. Devi, R. R. Koner, A. Halder and C. S. Yadav, *EPL*, 2020, **130**, 47002.
